# Supplementary material for: Tofersen decreases neurofilament levels supporting the pathogenesis of the SOD1 p.D91A variant in amyotrophic lateral sclerosis patients
Source: PubMed Central journal article supplement (PMC11272917; doi:10.1038/s43856-024-00573-0), 2024-07-25
Supplement: 43856_2024_573_MOESM1_ESM.pdf [file 43856_2024_573_MOESM1_ESM.pdf]

**Suppl. Table 1. Basal patient characteristics.**

| Patient Nr.                                 | Zygosity of SOD1 p.D91A mutation              | Sex (ratio f:m) | Age at onset (years); individual values removed for anonymisation | Site of onset | UMN or LMN predominance | Disease duration at start of tofersen treatment (months) | ALSFRS-R at start of tofersen treatment | ALS-PR at start of tofersen treatment | sNfL concentration at start of tofersen treatment (pg/ml) | Total number of tofersen injections |
|---------------------------------------------|-----------------------------------------------|-----------------|-------------------------------------------------------------------|---------------|-------------------------|----------------------------------------------------------|-----------------------------------------|---------------------------------------|-----------------------------------------------------------|-------------------------------------|
| 1                                           | heterozygous                                  | f               |                                                                   | arm           | UMN/LMN                 | 19                                                       | 42                                      | 0,32                                  | 57,84                                                     | 10                                  |
| 2                                           | heterozygous                                  | f               |                                                                   | leg           | LMN                     | 45                                                       | 37                                      | 0,24                                  | 49,97                                                     | 8                                   |
| 3                                           | heterozygous                                  | f               |                                                                   | leg           | UMN/LMN                 | 53                                                       | 28                                      | 0,38                                  | 36,66                                                     | 10                                  |
| 4                                           | heterozygous                                  | f               |                                                                   | leg           | UMN/LMN                 | 70                                                       | 32                                      | 0,23                                  | 16,81                                                     | 6                                   |
| 5                                           | heterozygous                                  | m               |                                                                   | leg           | UMN/LMN                 | 44                                                       | 42                                      | 0,12                                  | 37,2                                                      | 5                                   |
| Mean of patients with heterozygous mutation | heterozygous                                  | 4:1             | 55,8                                                              |               |                         | 46,2                                                     | 36,2                                    | 0,26                                  | 39,70                                                     | 7,80                                |
| 6                                           | homozygous                                    | f               |                                                                   | leg           | UMN/LMN                 | 42                                                       | 45                                      | 0,07                                  | 61,59                                                     | 18                                  |
| 7                                           | homozygous                                    | m               |                                                                   | leg           | UMN                     | 32                                                       | 46                                      | 0,06                                  | 63,26                                                     | 18                                  |
| 8                                           | homozygous                                    | f               |                                                                   | leg           | UMN/LMN                 | 22                                                       | 42                                      | 0,27                                  | 107,01                                                    | 18                                  |
| 9                                           | homozygous                                    | f               |                                                                   | leg           | UMN/LMN                 | 105                                                      | 25                                      | 0,22                                  | 55,7                                                      | 7                                   |
| 10                                          | homozygous                                    | m               |                                                                   | leg           | UMN/LMN                 | 40                                                       | 21                                      | 0,68                                  | 60,4                                                      | 7                                   |
| 11                                          | homozygous                                    | m               |                                                                   | leg           | UMN/LMN                 | 16                                                       | n.a.                                    | 0,07                                  | 39,06                                                     | 15                                  |
| Mean of patients with homozygous mutation   | homozygous                                    | 3:3             | 53,2                                                              |               |                         | 42,8                                                     | 35,8                                    | 0,23                                  | 64,50                                                     | 13,83                               |
| Mean of all patients                        | Combined heterozygous and homozygous mutation | 7:4             | 54,4                                                              |               |                         | 44,4                                                     | 36,0                                    | 0,24                                  | 53,23                                                     | 11,09                               |

n.a. = not available; ALS-PR: ALS progression rate: 48 - ALSFRS-R divided by disease duration [months]; UMN/LMN predominance: dominance of upper or lower motoneuron symptoms, respectively; NfL: Neurofilament light chain.

Suppl. Fig. 1

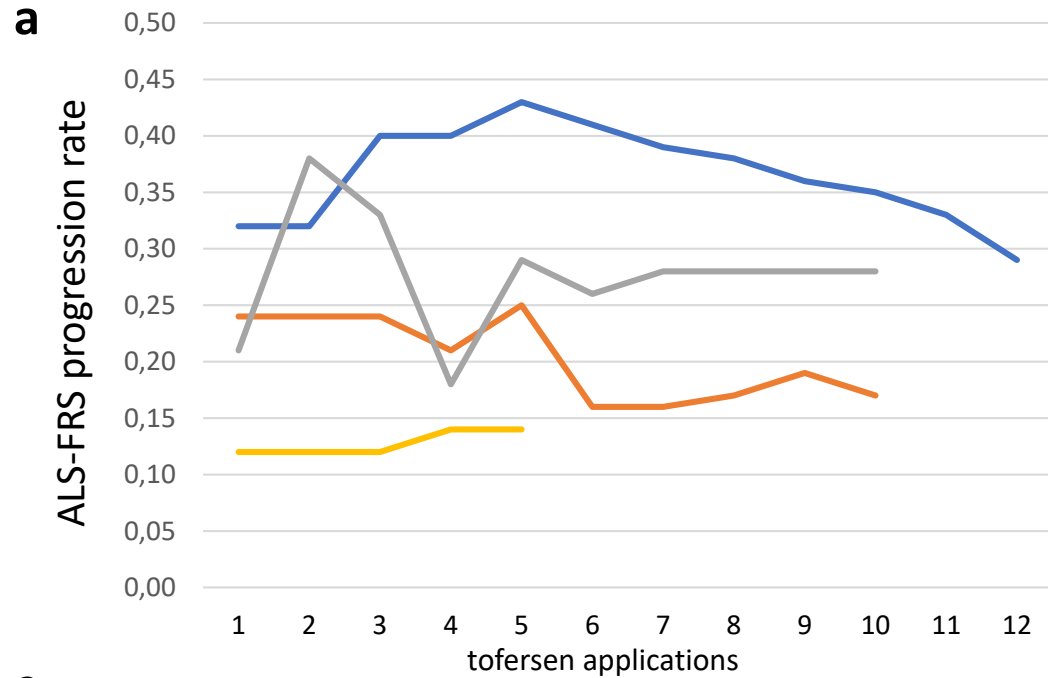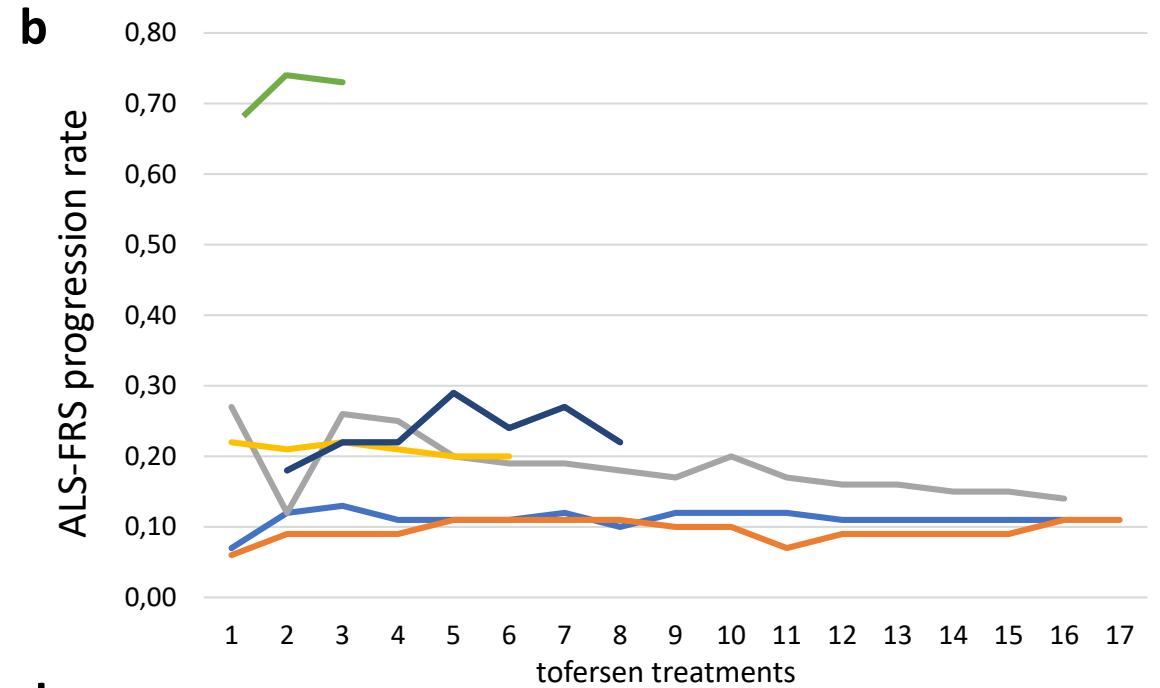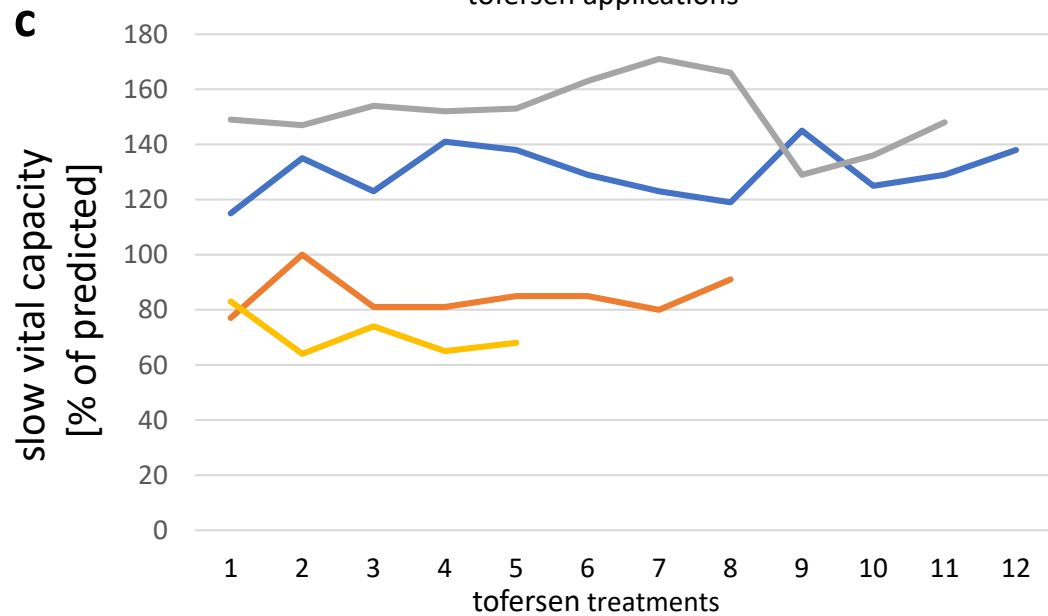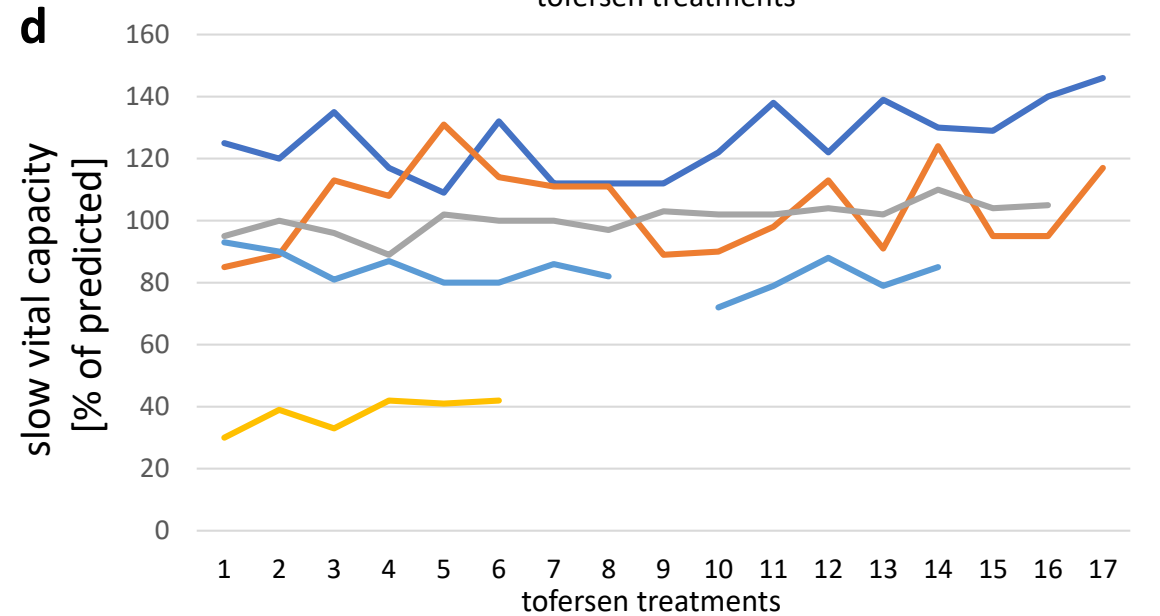

**Legend for Suppl. Fig. 1: ALSFRS-R progression rate and course of slow vital capacities (SVC).** Course of the mean ALS progression rate (ALS-PR; decline in ALSFRS-R points per month) in individual patients with heterozygous (a) or homozygous (b) p.D91A mutation in *SOD1* during treatment with tofersen. Longitudinal course of the slow vital capacity (SVC; measured in percent of the predicted value (corrected for height, age, sex, and weight)) in patients with heterozygous (c) or homozygous (d) p.D91A mutation in *SOD1* during treatment with tofersen. Data are given if at least two timepoints were available, we did not have the data for one and two patients for ALS-PR and SVC, respectively.

Suppl. Fig. 2

a

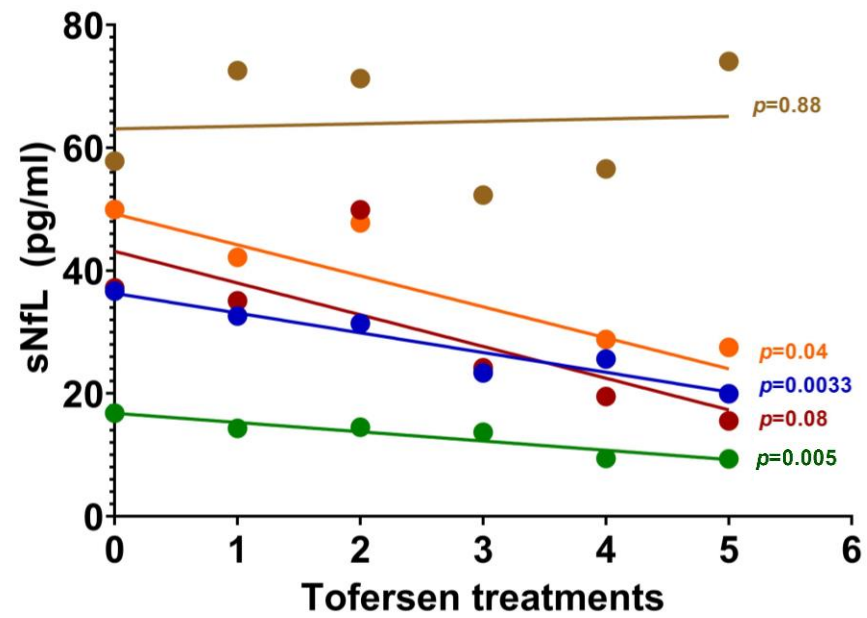

b

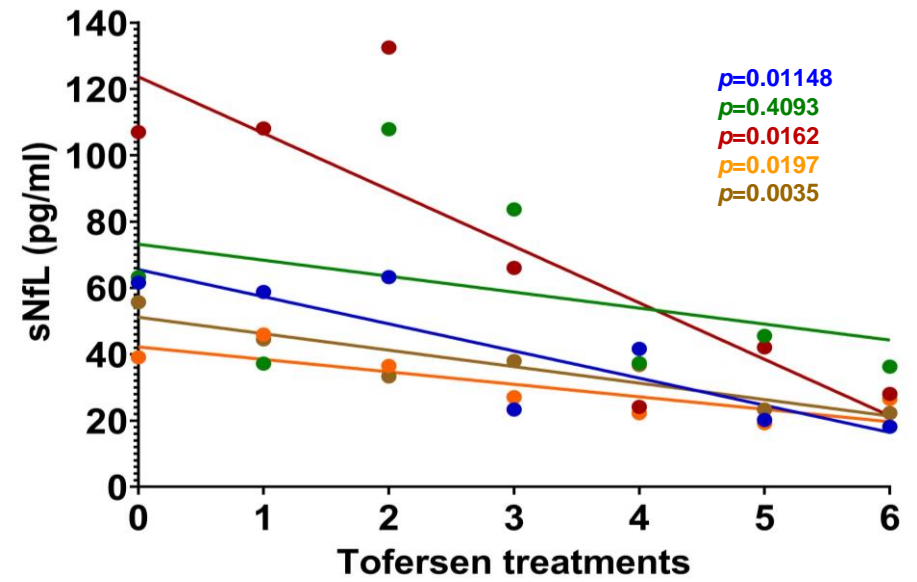

**Legend for Suppl. Fig. 2: Simple linear regression analysis of individual patient sNFL levels.** Results for heterozygous (a) and homozygous (b) *SOD1<sup>D91A</sup>* patients are displayed separately, and p values of the linear regression analysis are displayed for each individual patient in paired colours. Analysis was based on timepoints when all patients in the respective group received tofersen, and excluded later timepoints when first patients dropped out. Note that not every data was available at each timepoint. Numbers on the x-axis mean number of tofersen injections.
