# Supplementary material for: Tofersen decreases neurofilament levels supporting the pathogenesis of the SOD1 p.D91A variant in amyotrophic lateral sclerosis patients
Source: PubMed Central journal article supplement (PMC11272917; doi:10.1038/s43856-024-00573-0), 2024-07-25
Supplement: 43856_2024_573_MOESM2_ESM.pdf [file 43856_2024_573_MOESM2_ESM.pdf]

## Description of Additional Supplementary Files

**File name-** Supplementary data

**File description-** Numerical data and exact p values for figure 1.
